# Supplementary material for: Dynamic Responses of Antioxidant and Glyoxalase Systems to Seed Aging Based on Full-Length Transcriptome in Oat (Avena sativa L.)
Source: MDPI journal article supplement (doi:10.3390/antiox11020395), 2022-02-16
Supplement: s1 [file s1]

**Table S1.** Details of genes and their primers for qRT-PCR analysis

| No. | Gene code   | Accession number      | Nr/Nt description                                                                           | Primer Sequence (5'-3')                                    | Product Size (bp) | Tm (°C)      |
|-----|-------------|-----------------------|---------------------------------------------------------------------------------------------|------------------------------------------------------------|-------------------|--------------|
| 1   | AsCAT1      | F01_transcript_13967  | <i>Aegilops tauschii</i> subsp. stragulata catalase isozyme 1                               | F: ACAGGGATGAGGAGGTGAACTAC<br>R: CGCTGGATGAAACGGTCTTGC     | 193               | 58.8<br>59.7 |
| 2   | AsPOD1      | F01_transcript_67131  | <i>Triticum dicoccoides</i> 1-Cys peroxidase                                                | F: GCCCGACAAGAAGGTGAAGC<br>R: GCCGTGAGCAGCGAGTCC           | 96                | 58.6<br>59.9 |
| 3   | AsPOD12     | F01_transcript_17118  | <i>A. tauschii</i> peroxidase 12                                                            | F: CCCAAGGCAGAGTCCATCGTG<br>R: CCGTCCAGGAGCACTGAAGC        | 137               | 60.3<br>60.1 |
| 4   | AsMn-SOD    | F01_transcript_21558  | <i>Stipa purpurea</i> Mn-superoxide dismutase                                               | F: AGAAGCACCACGCCACCTAC<br>R: CGCCGCCGTTGAACITGATG         | 126               | 59.4<br>59.9 |
| 5   | AsCu/Zn-SOD | F01_transcript_22817  | <i>Agrostis stolonifera</i> cytosol Cu/Zn-superoxide dismutase                              | F: ACCGCCGTGACAGGAAGC<br>R: GCAACACCATCCGCTCCAG            | 200               | 59.1<br>58.1 |
| 6   | AsFe-SOD    | F01_transcript_33161  | <i>A. tauschii</i> subsp. stragulata Fe-superoxide dismutase                                | F: GCTGATGTGCTTGAATCCTTGAAC<br>R: GTGCTTGCTGGTGAACCTCC     | 150               | 58.8<br>59.3 |
| 7   | AsGR1       | F01_transcript_53759  | <i>A. tauschii</i> subsp. stragulata glutathione reductase, cytosolic                       | F: AGAAGCAGCATATCCAAACGACAG<br>R: CAGCCTTGAGTGCGACAGC      | 142               | 57.5<br>58.4 |
| 8   | AsGR2       | F01_transcript_81228  | <i>T. dicoccoides</i> glutathione reductase, chloroplastic-like                             | F: ACGACTACGACCTCTTACCACATC<br>R: GAACACACCCACGAAGCACAC    | 171               | 59.4<br>59.5 |
| 9   | AsMDHAR     | F01_transcript_29627  | <i>B. distachyon</i> monodehydroascorbate reductase                                         | F: GCGGAGCAGGCAGTGAAGG<br>R: GCGAGTAGAAGTAGGCGAGGTAG       | 85                | 58.4<br>56.5 |
| 10  | AsAOX1C     | F01_transcript_105355 | <i>T. dicoccoides</i> ubiquinol oxidase 1c, mitochondrial-like                              | F: GCTGGAGGAGGCGGAGAAC<br>R: TCGGTGTAGGAGTGGATGGC          | 200               | 59.1<br>58.3 |
| 11  | AsLDHA      | F01_transcript_70112  | <i>T. dicoccoides</i> L-lactate dehydrogenase A-like                                        | F: CCTTGCCACCTCCCTCCTC<br>R: CAGTTCTCCACAGCGTCTTG          | 213               | 58.3<br>58.5 |
| 12  | AsGLX1      | F01_transcript_18206  | <i>T. dicoccoides</i> lactoylglutathione lyase                                              | F: AAGTTATGCTCCGTGTTGGTGAC<br>R: TCGGTTGCCCTTGCTATATCTTG   | 200               | 59<br>59.2   |
| 13  | AsGLX2      | F01_transcript_67599  | <i>A. tauschii</i> subsp. stragulata probable hydroxyacylglutathione hydrolase 2            | F: CTTGAGCGTAGAACCAGGAAAC<br>R: ATTGTTGTGGCACCGTTGG        | 96                | 56.8<br>56.9 |
| 14  | AsNAC74     | F01_transcript_87068  | <i>B. distachyon</i> NAC domain-containing protein 74                                       | F: TGCCAAGCCTGCCCTGATATG<br>R: ATTATTGTTGCCACCTCGTTTCC     | 102               | 60<br>59.7   |
| 15  | AsNAC67     | F01_transcript_27463  | <i>B. distachyon</i> NAC domain-containing protein 67                                       | F: CCGCCTTGCCGACACCTC<br>R: TCTTCTCCCATTCGTTCTTCTGTC       | 107               | 59.8<br>59   |
| 16  | AsNAC83     | F01_transcript_44175  | <i>B. distachyon</i> NAC domain-containing protein 83                                       | F: CGGAAGGCTGGGTGCTCTG<br>R: TCGTGGACGGGATCTTCTTGG         | 118               | 59.7<br>59   |
| 17  | AsAIL1      | F01_transcript_28993  | <i>A. tauschii</i> subsp. stragulata AP2-like ethylene-responsive transcription factor AIL1 | F: GACGAGACAGGAGTTCATTGCG<br>R: TGCCGTGCTGGTGATGCC         | 101               | 59.1<br>59.8 |
| 18  | AsBBM1      | F01_transcript_63832  | <i>A. tauschii</i> subsp. stragulata AP2-like ethylene-responsive transcription factor BBM1 | F: CCACCAGTATCTGCCTCCACAAC<br>R: TTCGTCCACTTCCTCATTTCTTCGG | 147               | 60.7<br>60.5 |
| 19  | AsRAD2-13   | F01_transcript_77110  | <i>A. tauschii</i> subsp. stragulata ethylene-responsive transcription factor RAP2-13       | F: CCGCCGAGCAGAGGTTTC<br>R: GCGAGAAGCGAGTCCAGTC            | 124               | 60.2<br>59.9 |
| 20  | AsWNK8      | F01_transcript_61751  | <i>A. tauschii</i> subsp. stragulata probable serine/threonine-protein kinase WNK8          | F: CGTGGAGGTGGCGTGGAAC<br>R: GCGGTGGAAGGCGATGATGG          | 130               | 60.2<br>60.9 |
| 21  | AsMAPK2     | F01_transcript_37493  | <i>T. aestivum</i> mitogen-activated protein kinase 2                                       | F: ATAAGTGATACTCCAAGTCCATC<br>R: TATCTATTGCTGGTGTGTAAGTTCG | 112               | 56.2<br>56.3 |
| 22  | AsAPX       | F01_transcript_31727  | <i>Puccinellia tenuiflora</i> ascorbate peroxidase                                          | F: AAGGACTATGCTGAATCACACAAG<br>R: CAACTGCTACGCCGACTGC      | 133               | 56.9<br>58.5 |
| 23  | AsDHAR      | F01_transcript_51051  | <i>P. tenuiflora</i> dehydroascorbate reductase                                             | F: AAGACCAAGCCAGCCAAGGAG<br>R: AAGGACAGGACAGAACACAGACG     | 111               | 59.8<br>60.0 |
| 24  | AsEIF4A     | F01_transcript_15006  | <i>B. distachyon</i> eukaryotic initiation factor 4A-III homolog A                          | F: TCTCGCAGGATACGGATGTCTG<br>R: TCCATCGCATTTGGTCGCTCT      | 88                | 63.3<br>63.6 |

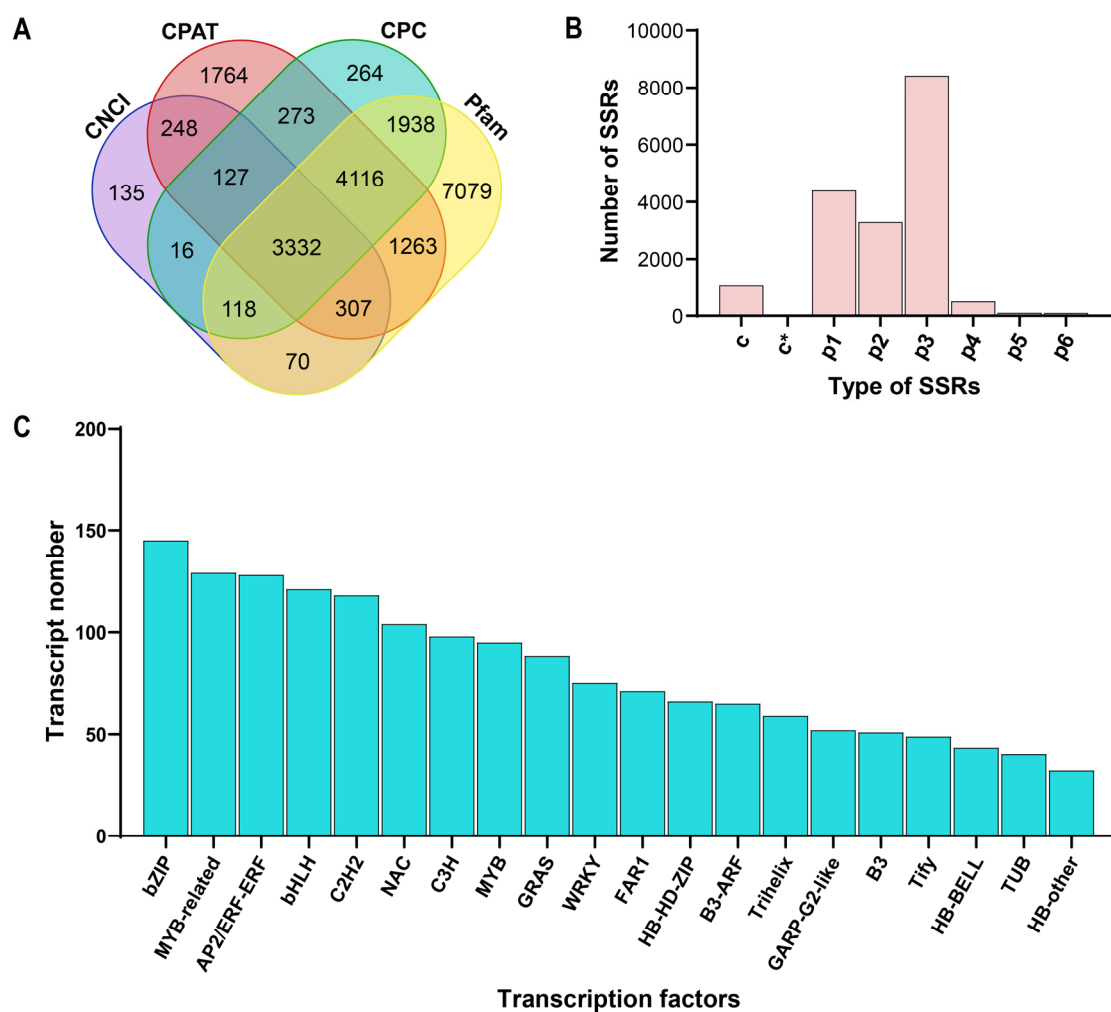

**Figure S1.** Statistics of identified lncRNAs, SSRs and TFs. **(A)** Venn diagram of identified lncRNAs from the Coding Potential Calculator (CPC), Coding-Non-Coding Index (CNCI), CPAT (Coding Potential Assessment Tool) and Pfam database. **(B)** Density distribution of seven SSR types. c, compound SSR; p1, mono-nucleotide; p2, di-nucleotide; p3, tri-nucleotide; p4, tetra-nucleotide; p5, penta-nucleotide; p6, hexa-nucleotide. **(C)** Statistics of the top 20 TFs; Table S1: Details of genes and their primers for qRT-PCR analysis.
